# Supplementary material for: Removal of Diverse and Abundant ARGs by MF-NF Process from Pig Manure and Digestate
Source: MDPI journal article supplement (doi:10.3390/membranes12070661), 2022-06-27
Supplement: s1 [file s1]

## Supporting information

**Table S1.** Characteristics of the pig manure and digestate samples

| Parameters                                           | Site 1     | Site 2     | Site 3    |
|------------------------------------------------------|------------|------------|-----------|
|                                                      | Pig manure | Pig manure | Digestate |
| TSS [gL <sup>-1</sup> ]                              | 3          | 4.9        | 1.8       |
| VSS [% of TSS]                                       | 83.3       | 78         | 67.8      |
| COD [gL <sup>-1</sup> ]                              | 11.3       | 11.8       | 19.5      |
| NH <sub>4</sub> <sup>+</sup> - N [gL <sup>-1</sup> ] | 4.4        | 2.9        | 1.8       |
| PO <sub>4</sub> <sup>-3</sup> [mgL <sup>-1</sup> ]   | 394        | 323        | 245       |
| pH                                                   | 7.8        | 7.8        | 7.8       |
| TOC [gL <sup>-1</sup> ]                              | 4.9        | 4.3        | 3.9       |
| DOC [gL <sup>-1</sup> ]                              | 3.3        | 3          | 1.8       |
| DTN [gL <sup>-1</sup> ]                              | 3          | 2          | 1.5       |
| Acetic acid [mgL <sup>-1</sup> ]                     | 3637       | 2211       | <100      |
| K <sup>+</sup> [mgL <sup>-1</sup> ]                  | 1794       | 1698       | 2663      |

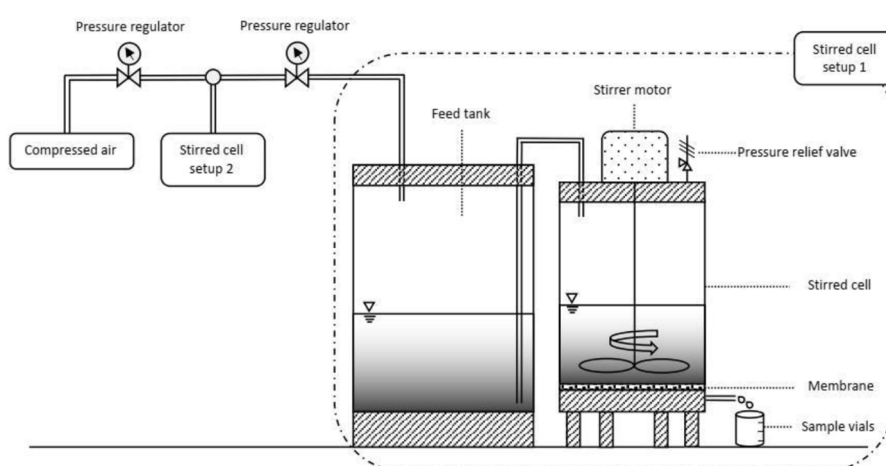

**Figure S1.** Stirred cell dead end membrane filtration system

| Description       | Total genes No. | Tetracycline | Aminoglycoside | MLSB | Sulfonamide | Other | Beta Lactam | Taxanomic | MDR |
|-------------------|-----------------|--------------|----------------|------|-------------|-------|-------------|-----------|-----|
| Site 1 manure     | 70              | 38           | 11             | 10   | 4           | 3     | 2           | 1         | 1   |
| Site 2 manure     | 66              | 34           | 10             | 10   | 4           | 3     | 3           | 1         | 1   |
| Site 3 digestate  | 53              | 26           | 8              | 8    | 4           | 3     | 2           | 1         | 1   |
| Site 1 N270 perm  | 16              | 7            | 6              | 2    | 1           | 0     | 0           | 0         | 0   |
| Site 2 NF270 perm | 25              | 15           | 6              | 2    | 2           | 0     | 0           | 0         | 0   |
| Site 3 NF270 perm | 13              | 4            | 6              | 1    | 2           | 0     | 0           | 0         | 0   |

**Figure S2.** Number of detected ARGs.

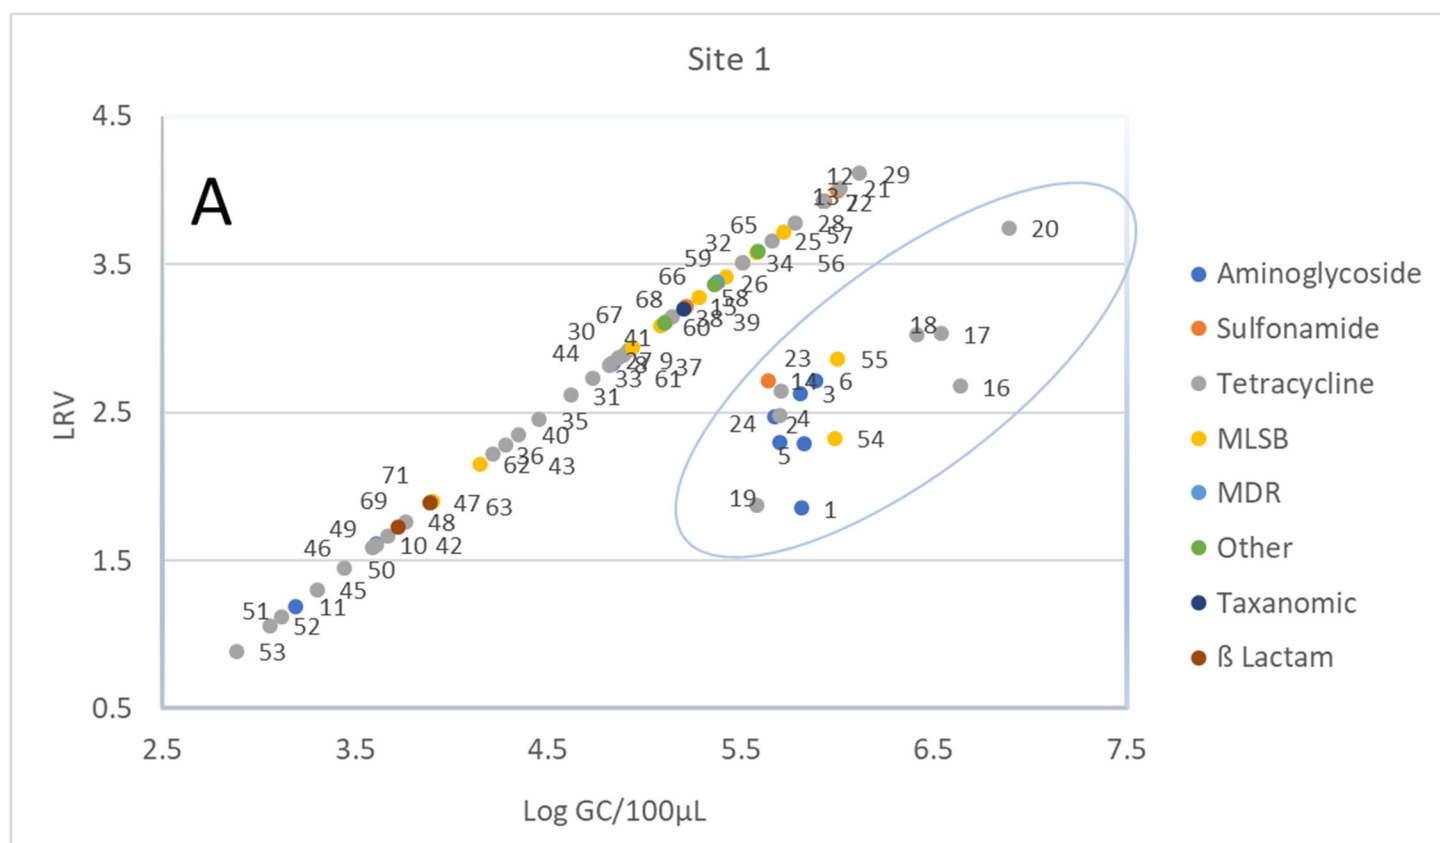

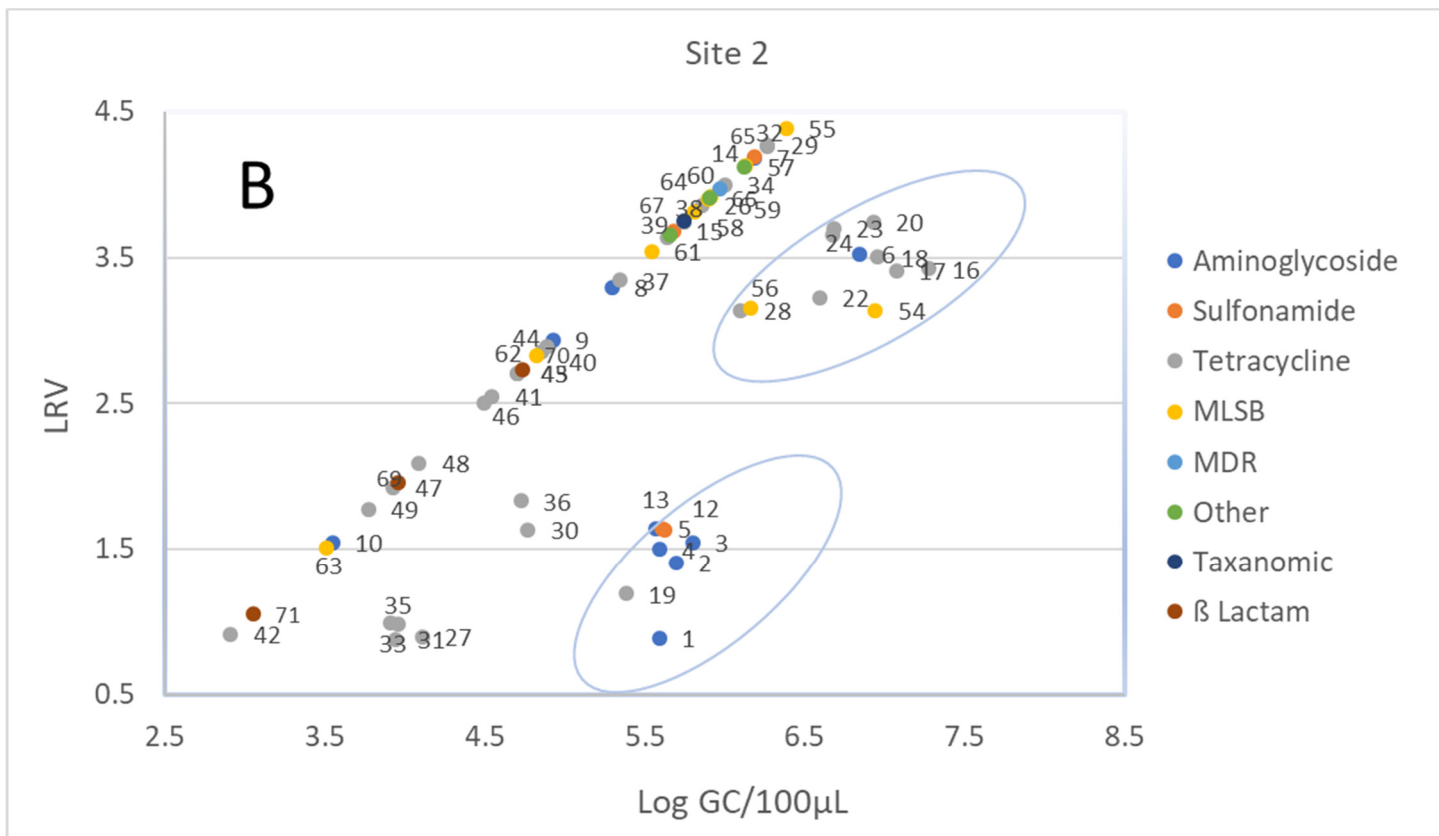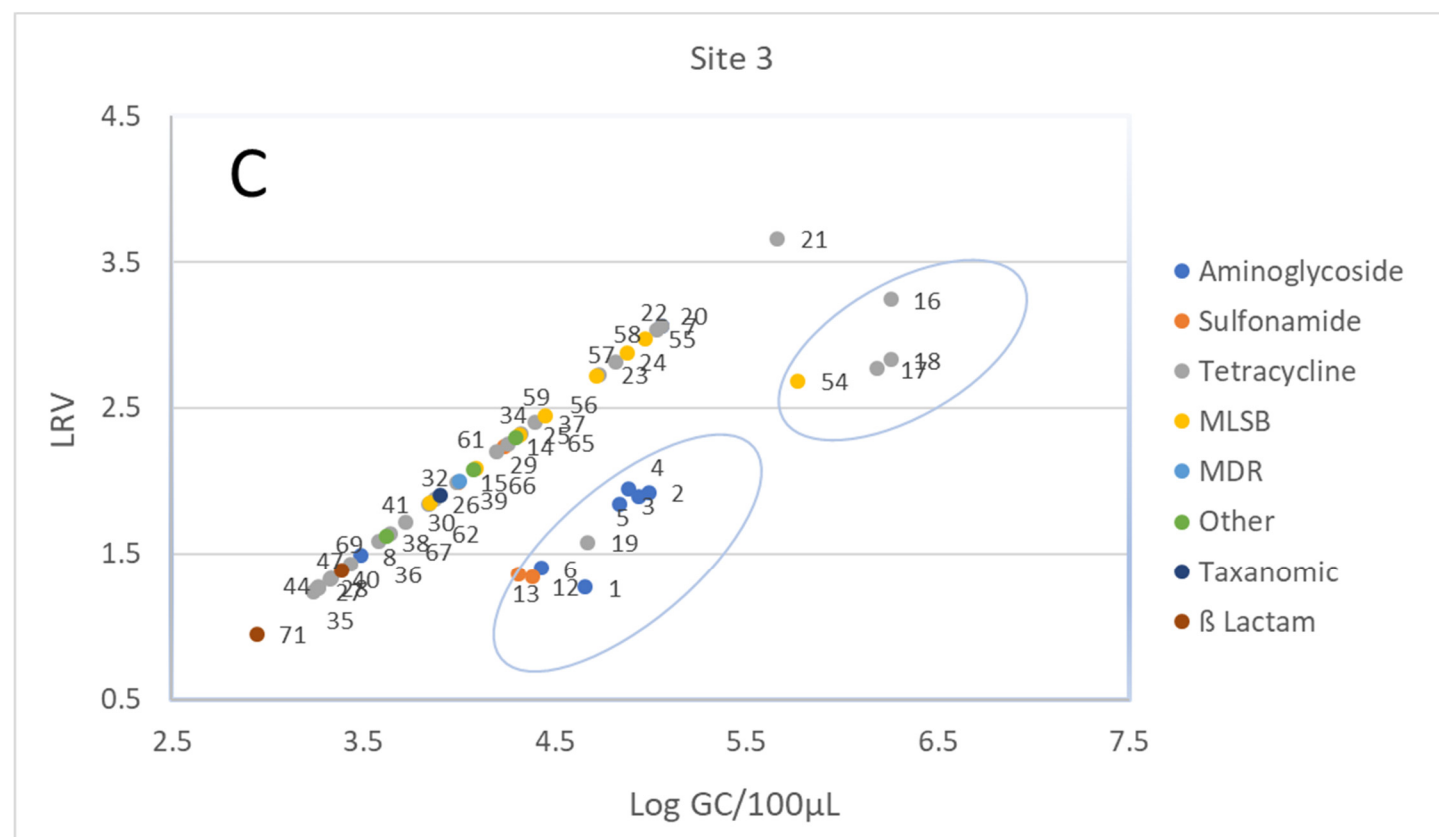

**Figure S3.** Relation between ARG concentration in the feed and their consequent removal by MF-NF process. Every ARG is represented with a unique serial number which is mentioned in Table SD2.

**Table S2. ARG characteristics**

| AB groups      | SL No. | ARGs         | Forward Primer                      | Reverse Primer                 |
|----------------|--------|--------------|-------------------------------------|--------------------------------|
| Aminoglycoside | 1      | strB         | GCTCGGTCGTGAGAACAATCT               | CAATTCGGTCGCCTGGTAGT           |
|                | 2      | aadA_1       | GTTGTGCACGACGACATCATT               | GGCTCGAAGATACCTGCAAGAA         |
|                | 3      | aadA2_3      | CAATGACATTCTTGGGGTATC               | GACCTACCAAGGCAACGCTATG         |
|                | 4      | aadA1        | TGTACGGCTCCGCAGTG                   | CACGGAATGATGTCGTCGTG           |
|                | 5      | aadA_2       | CGAGATTCTCCGCGCTGTA                 | GCTGCCATTCTCCAAATTGC           |
|                | 6      | str          | AATGAGTTTTGGAGTGTCTCAACGTA          | AATCAAAACCCCTATTAAAGCCAAT      |
|                | 7      | aadE         | TACCTTATTGCCCTTGAAGAGTTA            | GGAACATATGTCCTTTTAATTCTACAATCT |
|                | 8      | aadA2_1      | ACGGCTCCGCAGTGGAT                   | GGCCACAGTAACCAACAAATCA         |
|                | 9      | aadD         | CCGACAACATTCTACATCCTT               | ACCGAAGCGCTCGTCGTATA           |
|                | 10     | strA         | CCGGTGGCATTGAGAAAAA                 | GTGGCTCAACCTGCGAAAAAG          |
|                | 11     | aacC2        | ACGGCATTCTCGATTGCTTT                | CCGAGCTTCACGTAAGCATT           |
| Sulfonamide    | 12     | sul2_2       | TCATCTGCCAAACTCGTCGTTA              | GTCAAAGAACGCCGAATGT            |
|                | 13     | sul2_1       | TCCGGTGGAGGCCGGTATCTGG              | CGGGAATGCCATCTGCCTTGAG         |
|                | 14     | sul1_1       | CGCACCGGAAACATCGCTGCAC              | TGAAAGTTCGCGCGCAAGGCTCG        |
|                | 15     | sul1_2       | GCCGATGAGATCAGACGTATTG              | CGCATAGCGCTGGGTTTC             |
| Tetracycline   | 16     | tetM         | GGAGCGATTACAGAATTAGGAAGC            | TCCATATGCTCGCGTGTCTC           |
|                | 17     | tetM_3       | CATCATAGACACGCCAGGACATAT            | CGCCATCTTTTGACAGAAATCA         |
|                | 18     | tetM_2       | GCAATTCTACTGATTCTGC                 | CTGTTTGATTACAATTTCCGC          |
|                | 19     | tetH         | TTTGGGTCATCTTACCAGCATTA             | TTGCGCATTATCATCGACAGA          |
|                | 20     | tetPA        | GGAACCTTAGTTCAGTGACTTGG             | CCCATTTAACCAACGCACTGAA         |
|                | 21     | tetM_1       | TAATATTGGAGTTTGTAGCTCATGTTGATG      | CCTCTCTGACGTTCTAAAGCGTATTAT    |
|                | 22     | tetW         | ATGAACATTCCCACCGTTATCTTT            | ATATCGGCGGAGAGCTTATCC          |
|                | 23     | tet36_1      | AGAATACTCAGCAGAGGTCACTTCT           | TGGTAGGTCGATAACCCGAAAAAT       |
|                | 24     | tetT         | CCATATAGAGGTTCCACCAATCC             | TGACCCTATTGGTAGTGTTCTATTG      |
|                | 25     | tet36_2      | TGCAGGAAAGACCTCCATTACAG             | CTTTGTCCACACTTCCACGTAATG       |
|                | 26     | tetPB_1      | TGGGCGACAGTAGGCTTAGAA               | TGACCCTACTGAAACATTAGAATATACCT  |
|                | 27     | tetA/B_2     | GCCAGTGCTGTTGTTGTCAT                | TGAAAGCAACACGCCCTAAATACA       |
|                | 28     | tetQ         | CGCCTCAGAAGTAAGTTCATACACTAAG        | TCGTTTCATGCGGATATTATCAGAAT     |
|                | 29     | tetA(P)      | AGTTGCAGATGTGTATAGTCGTAACACTATCTATT | TGCTACAAGTACGAAACAAAACTAGAA    |
|                | 30     | tetX         | AAATTTGTTACCGACACGGAAGTT            | CATAGCTGAAAAATCCAGGACAGTT      |
|                | 31     | tetR_4       | CGCGATGGAGCAAAAGTACAT               | AGTGAAAAACCTTGTTGGCATAAAA      |
|                | 32     | tet44        | CTCATGTAGATGCAGGAAAGACG             | GTAACCTGCTGCCTGAATTGTGA        |
|                | 33     | tetA/B_1     | AGTGCGCTTTGGATGTGTGA                | AGCCCCAGTAGCTCCTGTGA           |
|                | 34     | tetO_2       | CAACATTAACGGAAGTTTATTGTATACCA       | TTGACGCTCCAAATTCATTGTATC       |
|                | 35     | tetD         | AATTGCACTGCCTGCATTGC                | GACAGATTGCCAGCAGCAGA           |
|                | 36     | tetR_3       | CGCGATAGACGCTTCGA                   | TCCTGACAACGAGCCTCCTT           |
|                | 37     | tetL_2       | ATGTTGTAGTTGCGCGCTATAT              | ATCGCTGGACCGACTCCTT            |
|                | 38     | tetO_1       | ATGTGGATACTACAACGCATGAGATT          | TGCCTCCACATGATATTTTCTCT        |
|                | 39     | tet32        | CCATTACTTCGGACAACGGTAGA             | CAATCTCTGTGAGGGCATTAAACA       |
|                | 40     | tetA_2       | CTCACCAGCCTGACCTCGAT                | CACGTTGTTATAGAAGCCGCATAG       |
|                | 41     | tetG_2       | CATCAGCGCCGGTCTTATG                 | CCCCATGTAGCCGAACCA             |
|                | 42     | tetC_1       | CATATCGCAATACATGCGAAAAA             | AAAGCCGCGGTAATAGCAA            |
|                | 43     | tetR         | CCGTCAATGCGCTGATGAC                 | GCCATCCATCGCAATCACC            |
|                | 44     | tetG         | TGCGTTCTCGCTTGCC                    | CCGCGAGCGACAACCA               |
|                | 45     | tetC_3       | TGCGTTGATGCAATTTCTATGC              | GGAATGGTGCATGCAAGGAG           |
|                | 46     | tetS         | TTAAGGACAACTTTCTGACGACATC           | TGTCTCCCATGTTCTGGTTCA          |
|                | 47     | tetG_1       | TCAACCATTGCCGATTCTGA                | TGGCCCGCAATCATG                |
|                | 48     | tetR_1       | CAATCCATCGCAATCAC                   | GACAATCAGCTACTTCAC             |
|                | 49     | tet39        | TATAGCGGGTCCGTAATAGGTG              | CCATAACGATCTGCCCATAGATAAC      |
|                | 50     | tetM_4       | TGGCAAGACGATTTGACTGA                | GATCGCTCACTTCAGCGATAA          |
|                | 51     | tetPB_3      | ACACCTGGACACGCTGATTTT               | ACCGTCTAGAACGCGGAATG           |
|                | 52     | tetK         | CAGCAGTCATTGGAAAATTATCTGATTATA      | CCTTGTAATAACCTACCAAAAATCAAAATA |
|                | 53     | tetR_2       | ATGAGTTGCGGCAGAAATTTCC              | GGTTGTGCGCGAAATGATT            |
| MLSB           | 54     | ermB_2       | GAACACTAGGGTTGTTCTTGCA              | CTGGAACATCTGTGGTATGGC          |
|                | 55     | lnuB         | GGATCGTTTTACCAAGGAGAAGG             | AGCATAGCCTTCGTATCAGGAA         |
|                | 56     | mefA_1       | CCGTAGCATTGGAACAGCTTTT              | AAACGGAGTATAAGAGTGCTGCAA       |
|                | 57     | lnuB_2       | AAAGGAGAAGGTGACCAATACTCTGA          | GGAGCTACGTCAAAACACCAAGTT       |
|                | 58     | ermF         | TCTGATGCCGGAATGTTCAAG               | TGAAGGACAATTGAACCTCCCA         |
|                | 59     | lnuB_1       | TGAACATAATCCCCTCGTTTAAAGAT          | TAATTGCCCTGTTTCATCGTAAATAA     |
|                | 60     | erm35        | TTGAAAACGATGTTGCATTAAAGTCA          | TCTATAATCAACAATAACCACTTGAACGT  |
|                | 61     | mefA         | CCGTAGCATTGGAACAGCTTTT              | AAACGGAGTATAAGAGTGCTGCAA       |
|                | 62     | mphA         | TCAGCGGATGATCGACTG                  | GAGGGCGTAGAGGGCGTA             |
|                | 63     | mphA_1       | CTGACGCGCTCCGTGTT                   | GGTGGTGCATGGCGATCT             |
| MDR            | 64     | cefa_qacelta | TAGTTGGCGAAGTAATCGCAAC              | TGCGATGCCATAACCGATTATG         |
| Other          | 65     | qacEΔ1_2     | CCCCTTCCGCGTTGT                     | CGACCACTGCATCAGCAACA           |
|                | 66     | qacEΔ1_3     | GTCGGTGTGCTTATGCAGTCT               | CAACCAGGCAATGGCTGTAA           |
|                | 67     | qacEΔ1_1     | TCGCAACATCCGCAATAAAA                | ATGGATTTTCAGAACCAAGAGAAAGAAA   |
| Taxonomic      | 68     | Enterococci  | AGAAATTTCAAACGAACCTTG               | CAGTGCTCTACCTCCATCATT          |
| Beta Lactam    | 69     | blaSFO       | CCGCCGCCATCCAGTA                    | GGGCCGCCAAGATGCT               |
|                | 70     | cfxA         | TCATTCTCGTTCAAGTTTTCAGA             | TGCAGCACCAAGAGGAGATGT          |
|                | 71     | blaOXY       | CGTTCAGGCGGCAGGTT                   | GCCGCGATATAAGATTGAGAATT        |
